# Supplementary material for: Self-reducible copper ion complex ink for air sinterable conductive electrodes
Source: Royal Society of Chemistry journal article supplement (doi:10.1039/c6tc04145k), 2016-01-01
Supplement: c6tc04145k1.pdf [file c6tc04145k1.pdf]

## Supporting Information

# Self-reducible Copper ion complex ink for air sinter- able conductive electrode

Sanghun Cho<sup>a</sup>, Zhenxing Yin<sup>a</sup>, Yong-Keon Ahn<sup>a</sup>, Yuanzhe Piao<sup>a,b</sup>, Jeeyoung Yoo<sup>a\*</sup>, and Youn Sang Kim<sup>a,b\*</sup>

<sup>a</sup> Program in Nano Science and Technology, Graduate School of Convergence Science and Technology, Seoul National University, Suwon 443-270, Republic of Korea

<sup>b</sup> Advanced Institutes of Convergence Technology, Suwon 443-270, Republic of Korea

\*E-mail: [younskim@snu.ac.kr](mailto:younskim@snu.ac.kr), [jyoo78@snu.ac.kr](mailto:jyoo78@snu.ac.kr)

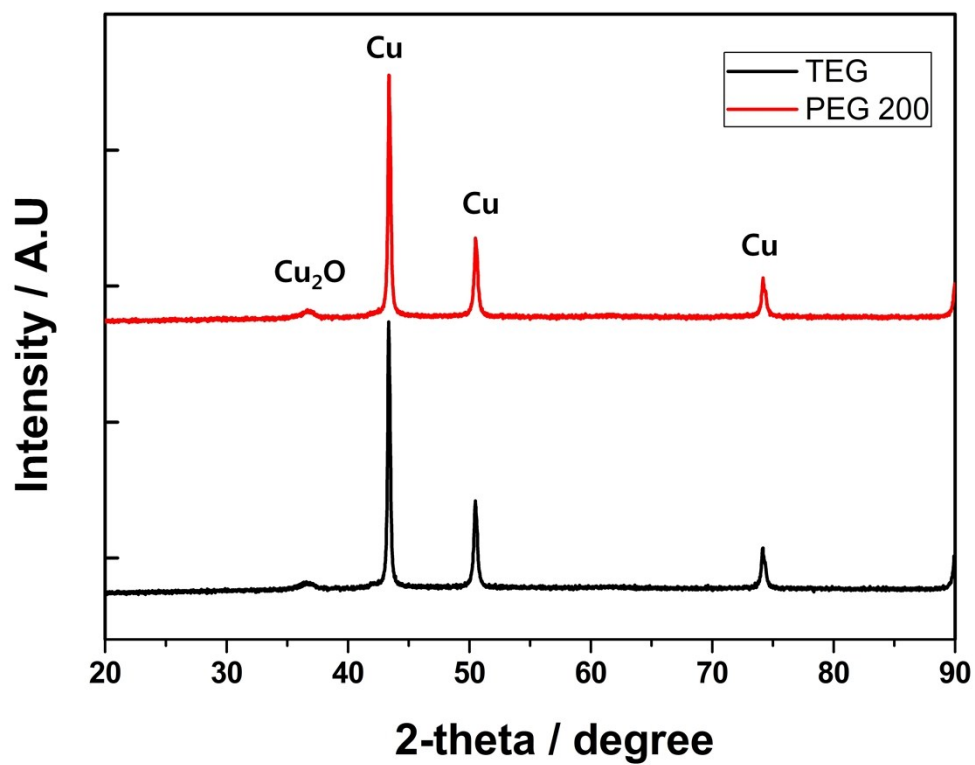

**Fig. S1.** XRD patterns of the sintered Cu electrode film made using pCu-ink with TEG and PEG

200

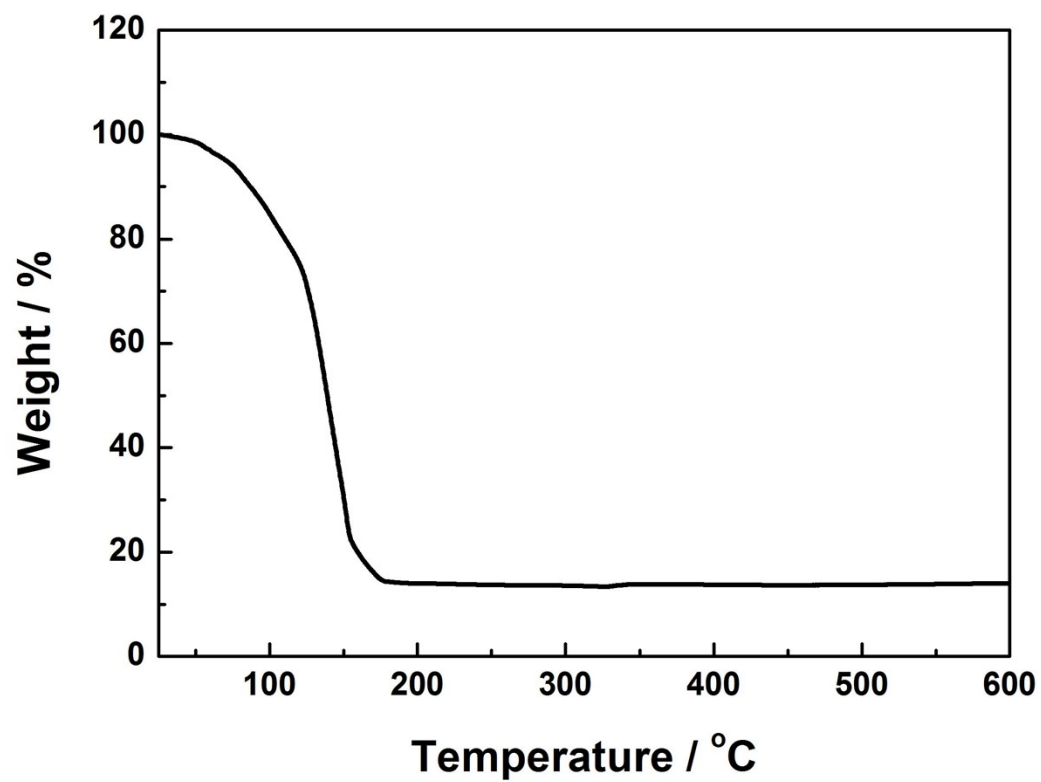

**Fig. S2.** TGA results of 3wt % gCu-ink under ambient air condition

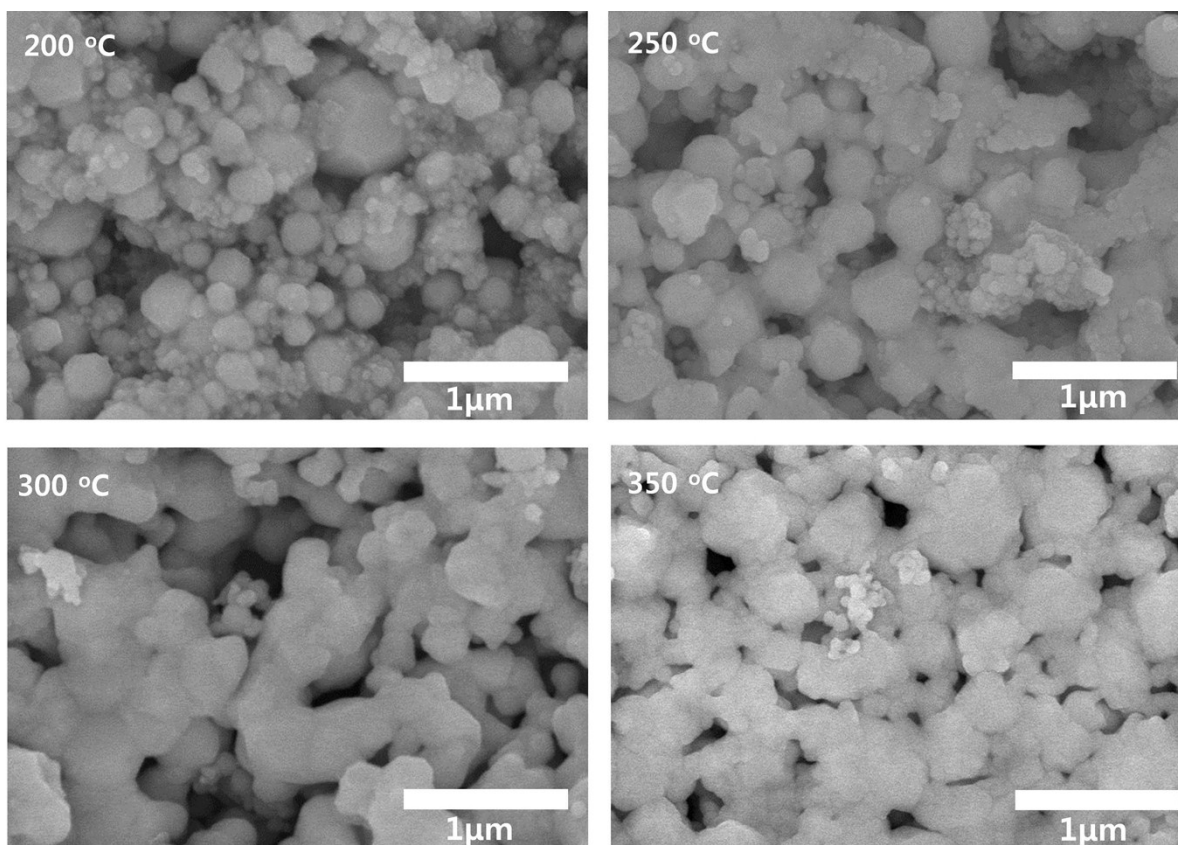

**Fig. S3.** Surface morphologies of the sintered Cu electrode films made using 3 wt% gCu-ink at (a) 200 °C, (b) 250 °C, (c) 300 °C and (d) 350 °C

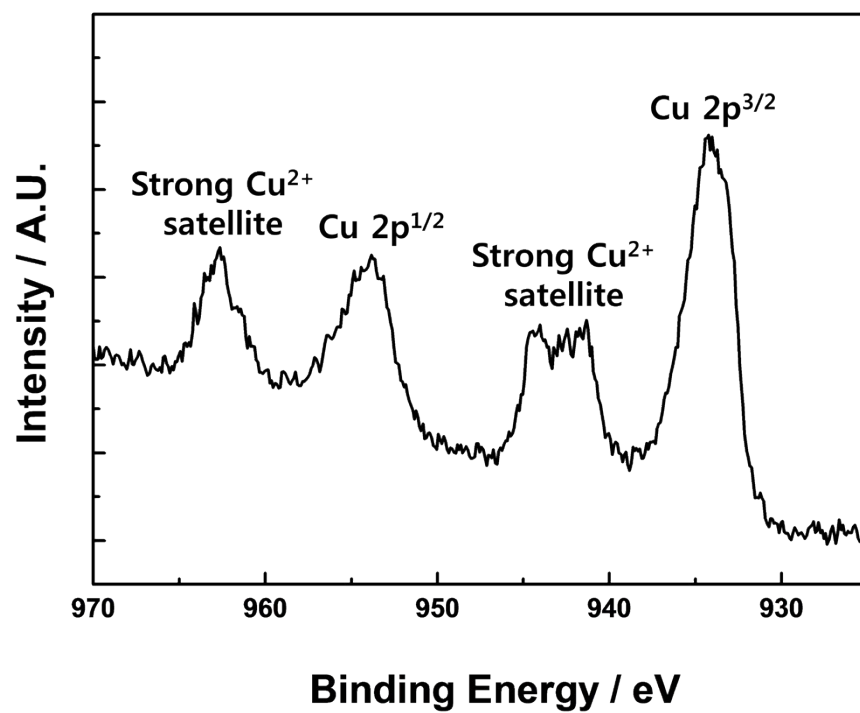

**Fig. S4.** XPS Cu 2p spectra of the sintered Cu electrode film at 350 °C with the intrinsic Cu-ink

After peel off test (10 times)

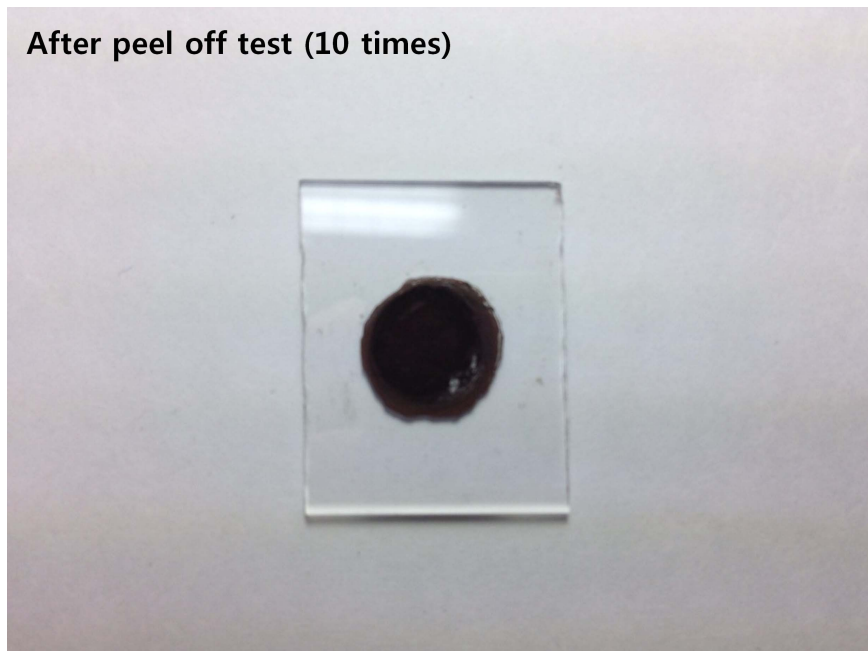

**Fig. S5.** After 10 times peel-off test, optical photograph image of adhesion enhanced Cu electrode film made using gCu-ink with 1 wt% APTES

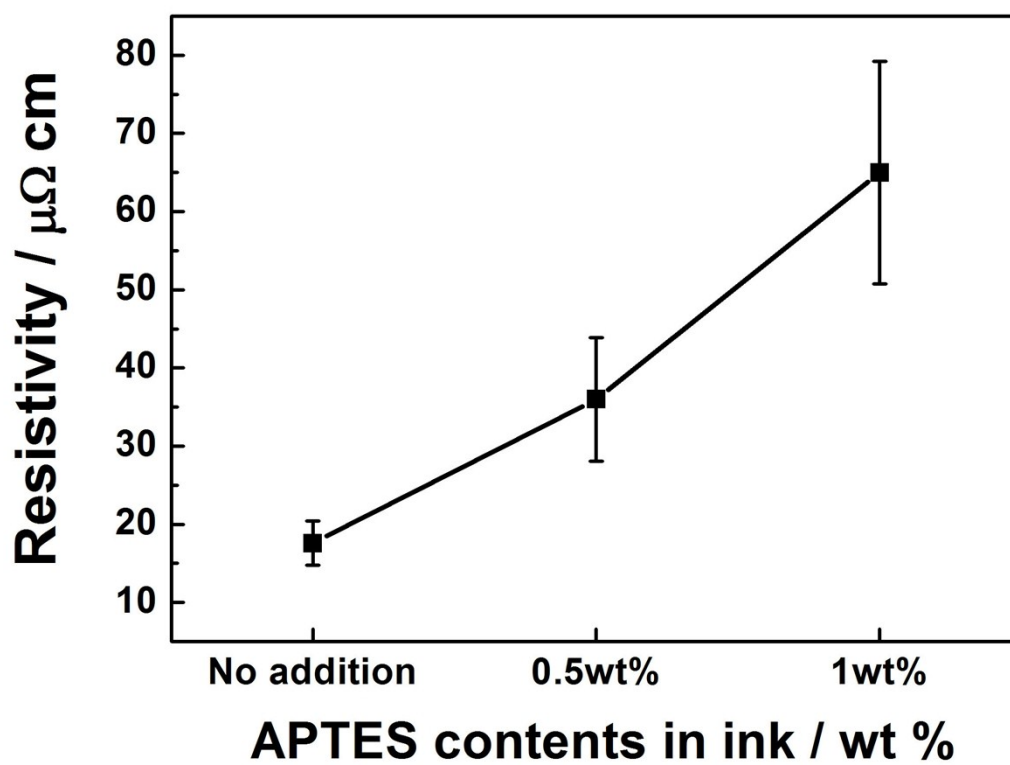

**Fig. S6.** Electrical resistivity of gCu-ink with no addition, 0.5, and 1 wt% APTES

As prepared glycerol mixed ink

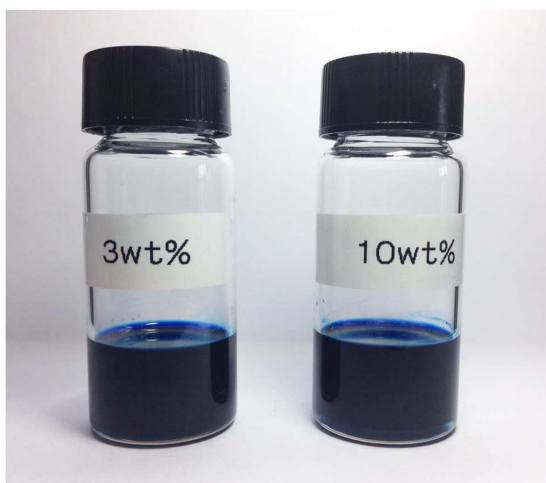

After 4weeks glycerol mixed ink

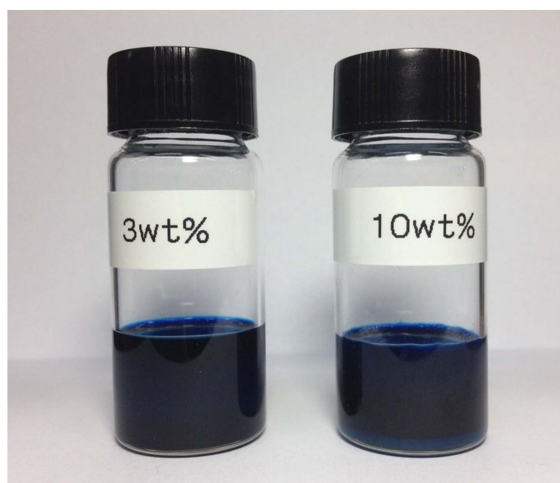

**Fig. S7.** Photograph of 3wt % and 10 wt% gCu-ink dissolved in IPA. For 4 weeks, phase separation was not found in gCu-ink mixture.



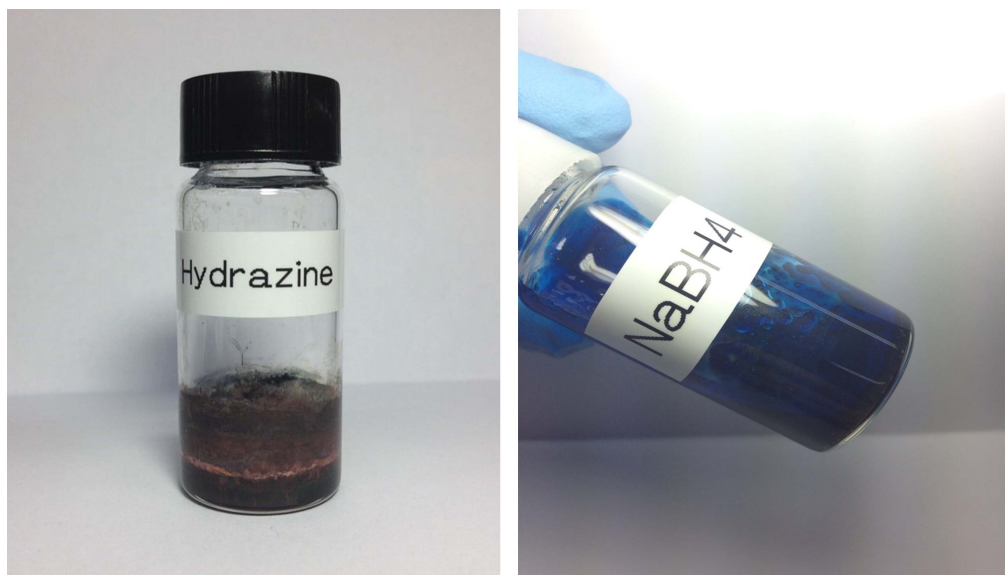

**Fig. S8.** Image of the Cu-ink by addition of 3wt % hydrazine ( $\text{N}_2\text{H}_2$ ) and sodium borohydride ( $\text{NaBH}_4$ ), respectively
